# Supplementary material for: A preliminary world checklist of fern-mining insects
Source: Biodivers Data J. 2021 Mar 25;9:e62839. doi: 10.3897/BDJ.9.e62839 (PMC8016819; doi:10.3897/BDJ.9.e62839)
Supplement: Supplementary material 2 — The number of fern-miners in each insect family and each insect order [file bdj-09-e62839-s002.xlsx]

## Sheet: Sheet1
Insect order	Insect family	Miner richness	Miner percentage
Diptera	Agromyzidae	26	0.203125
Diptera	Anthomyiidae	18	0.140625
Diptera	Drosophilidae	5	0.0390625
Diptera	Chironomidae	1	0.0078125
Diptera	Pallopteridae	1	0.0078125
Coleoptera	Buprestidae	15	0.117188
Coleoptera	Chrysomelidae	13	0.101562
Coleoptera	Curculionidae	5	0.0390625
Lepidoptera	Crambidae	7	0.0546875
Lepidoptera	Noctuidae	7	0.0546875
Lepidoptera	Tineidae	4	0.03125
Lepidoptera	Tortricidae	3	0.0234375
Lepidoptera	Cosmopterigidae	2	0.015625
Lepidoptera	Gelechiidae	2	0.015625
Lepidoptera	Hepialidae	2	0.015625
Lepidoptera	Psychidae	1	0.0078125
Hymenoptera	Blasticotomidae	13	0.101562
Hymenoptera	Tenthredinidae	3	0.0234375
Total		128	1
